# Supplementary material for: Tunable reinforcement of epoxy-silica nanocomposites with ionic liquids
Source: Royal Society of Chemistry journal article supplement (doi:10.1039/c2jm30830d), 2012-01-01
Supplement: c2jm30830d.pdf [file c2jm30830d.pdf]

# **Tunable reinforcement of epoxy-silica nanocomposites with ionic liquids**

**Ricardo K. Donato, Katarzyna Z. Donato, Henri S. Schrekker, Libor Matějka\***

## **Supplementary Information**

*1-Triethylene glycol monomethyl ether-3-methylimidazolium methanesulfonate.*

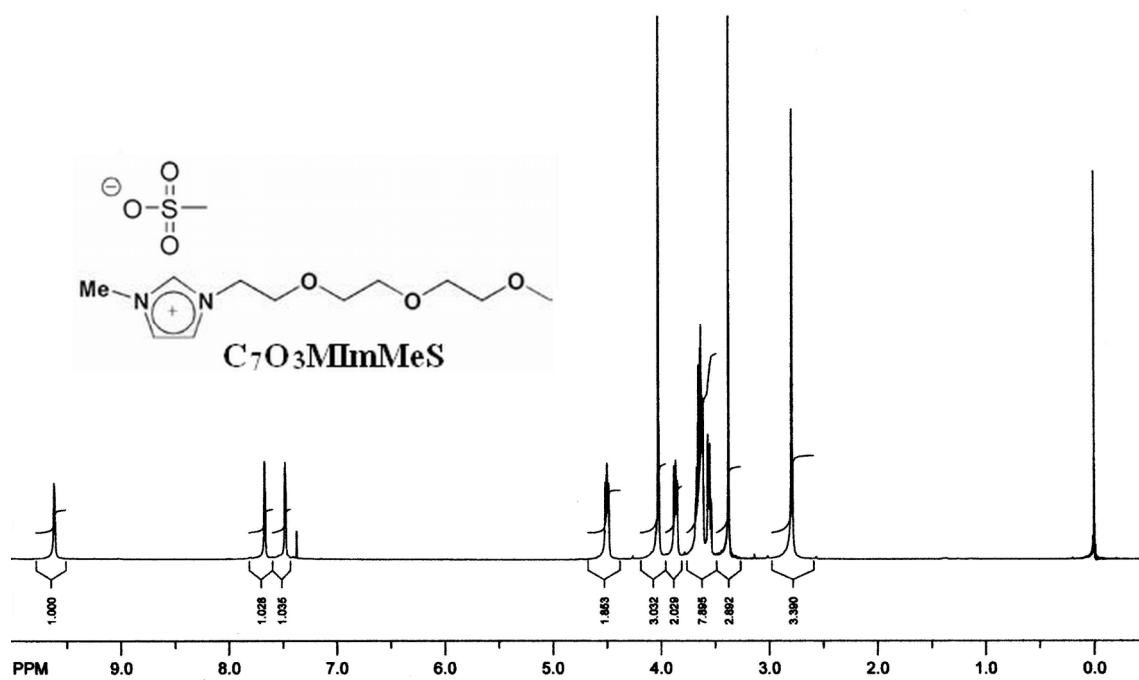

**Figure S1.** <sup>1</sup>H NMR spectrum of 1-triethylene glycol monomethyl ether-3-methylimidazolium methanesulfonate (C<sub>7</sub>O<sub>3</sub>MImMeS) (300 MHz, CDCl<sub>3</sub>).

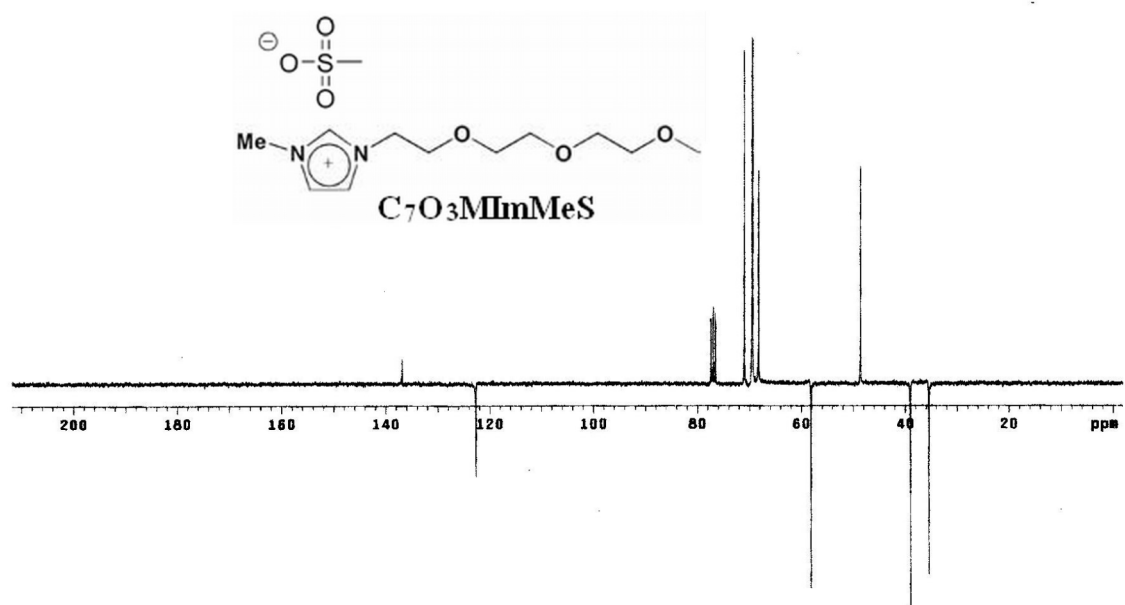

**Figure S2.** <sup>13</sup>C NMR spectrum of 1-triethylene glycol monomethyl ether-3-methylimidazolium methanesulfonate (C<sub>7</sub>O<sub>3</sub>MImMeS) (75 MHz, CDCl<sub>3</sub>).

*1-Decyl-3-methylimidazolium tetrafluoroborate.*

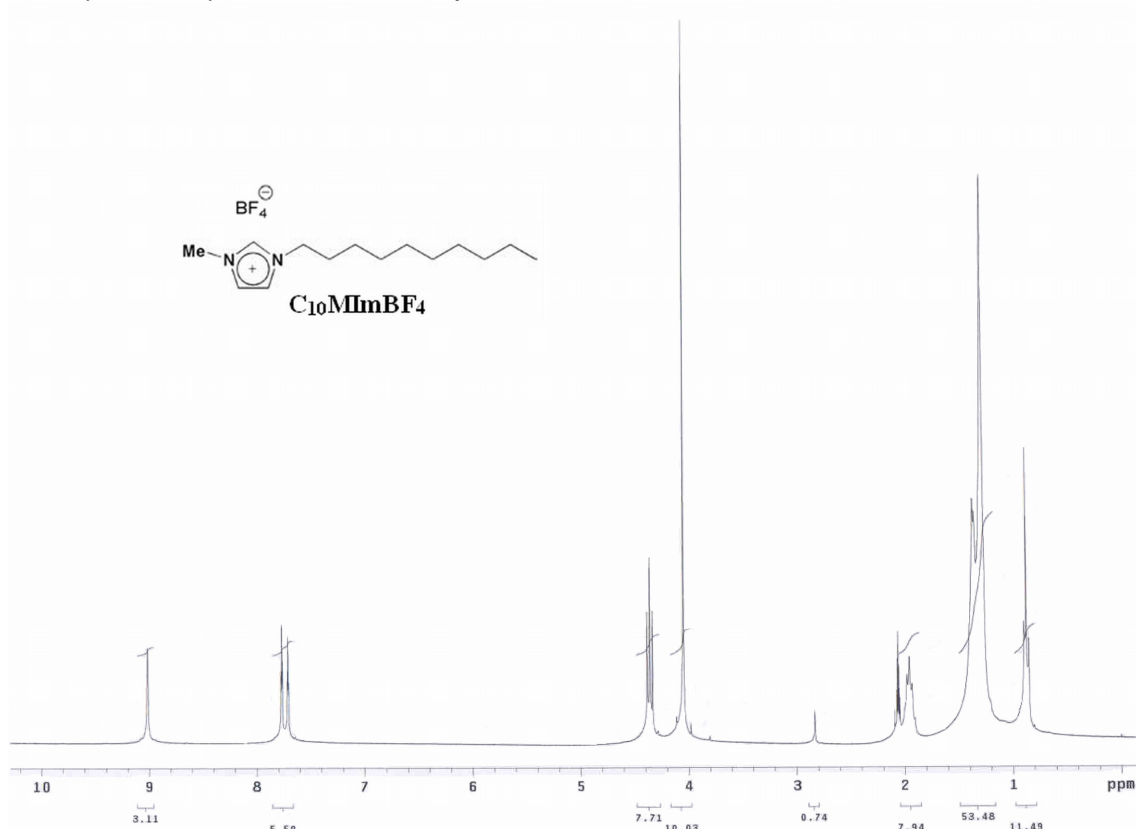

**Figure S3.** <sup>1</sup>H NMR spectrum of 1-decyl-3-methylimidazolium tetrafluoroborate (C<sub>10</sub>MImBF<sub>4</sub>) (300 MHz, d<sub>6</sub>-acetone).

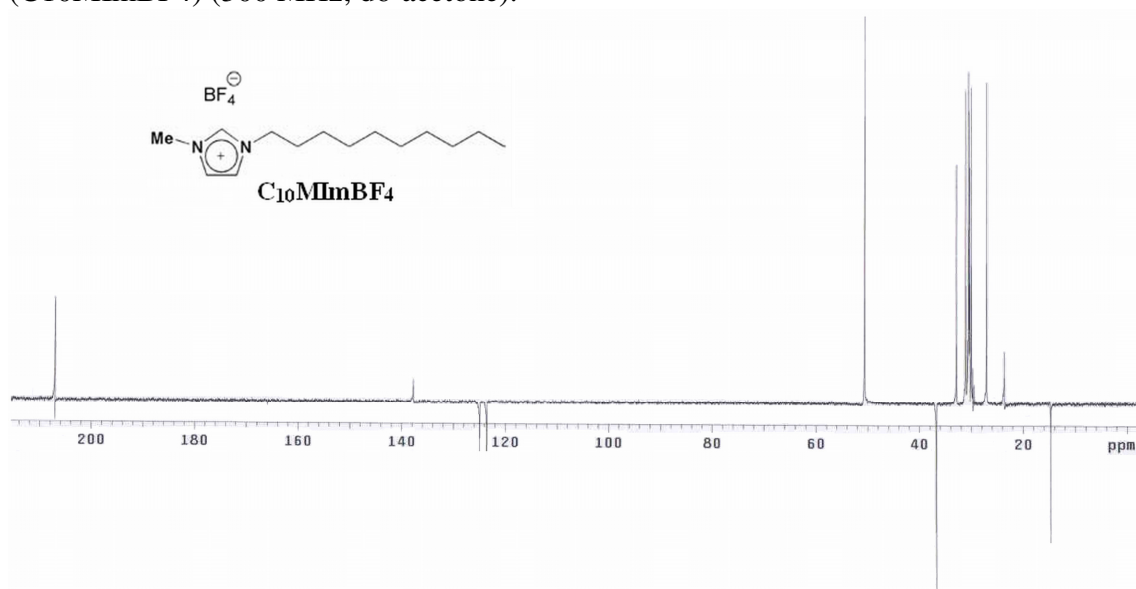

**Figure S4.** <sup>13</sup>C NMR spectrum of ionic 1-decyl-3-methylimidazolium tetrafluoroborate (C<sub>10</sub>MImBF<sub>4</sub>) (75 MHz, d<sub>6</sub>-acetone).

1-Hexyl-3-methylimidazolium methanesulfonate.

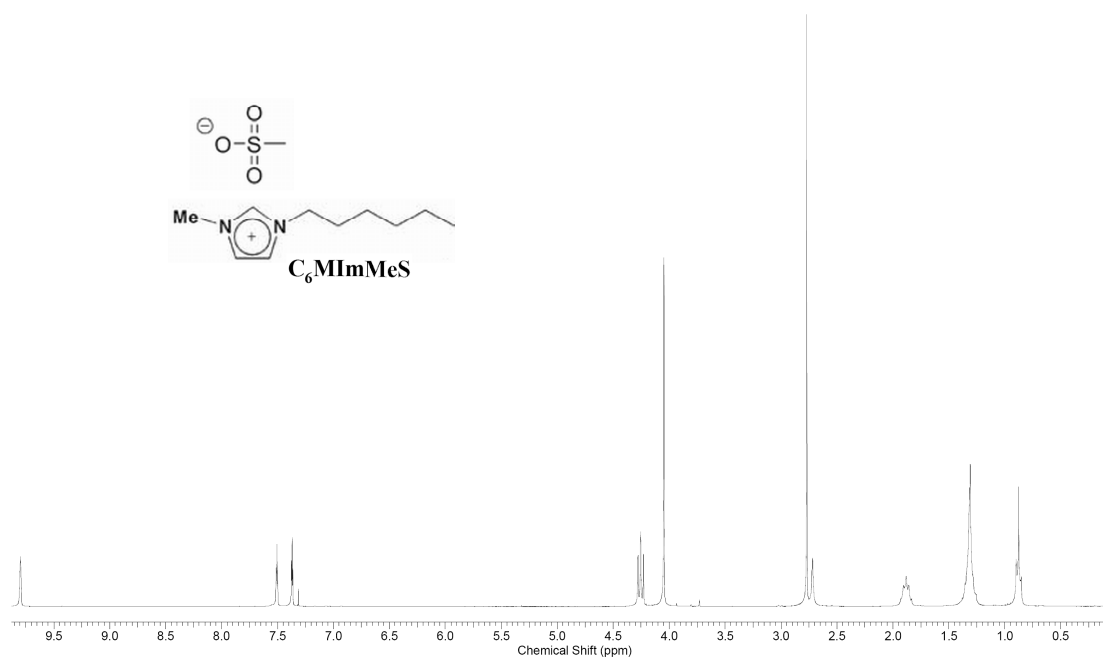

Figure S5. <sup>1</sup>H NMR spectrum of 1-hexyl-3-methylimidazolium methanesulfonate (C<sub>6</sub>MImMeS) (300 MHz, d<sub>6</sub>-acetone).
